# Supplementary material for: Design and synthesis of RNA-responsive o-phenanthroline Eu(iii) complexes as probes for STED super-resolution dual-targeted bioimaging
Source: Royal Society of Chemistry journal article supplement (doi:10.1039/d3qi01044a), 2023-01-01
Supplement: d3qi01044a1.pdf [file d3qi01044a1.pdf]

## Supplementary Information

### **Design and Synthesis of RNA-Responsive o-Phenanthroline Eu(III) complexes Probes for STED Super-Resolution Dual-Targeted Bioimaging**

Hao Yuan,<sup>a</sup> Tao Wang,<sup>b</sup> Tong Zhu,<sup>b</sup> Zhihui Feng,<sup>b</sup> Fei Wang,<sup>b</sup> Yupeng Tian,<sup>b</sup> Xiaohe  
Tian<sup>a c d</sup>

<sup>a</sup> Department of Radiology and National Clinical Research Center for Geriatrics, Huaxi  
MR Research Center (HMRRC), Functional and Molecular Imaging Key Laboratory of  
Sichuan Province, West China Hospital, Sichuan University, Chengdu, China.

<sup>b</sup> College of Chemistry and Chemical Engineering, Key Laboratory of Functional  
Inorganic Material Chemistry of Anhui Province, Anhui University, Hefei 230601, PR  
China.

<sup>c</sup>. Orthopedics Department of Zunyi Medical University Affiliated Hospital

<sup>d</sup>. School of Basic Medicine, Kunming Medical University

## **Experimental Section**

### **1. Materials and Apparatus**

All chemical reagents and organic solvents were purchased from Aladdin Industries and Mcleaned Reagent Network, and were dried and purified according to standard methods. The <sup>1</sup>H-NMR and <sup>13</sup>C-NMR spectra were recorded on Bruker AV 400 spectrometer (Germany). Mass Spectrometer was recorded using Bruker Autoflex III TOF/TOF. UV-vis absorption spectra were performed by the UV-265 spectrophotometer. Fluorescence was measured on a Hitachi F-7000 spectrofluorometer. Confocal and STED imaging data acquisition and processing were performed using Leica SP8 microscopy, 100/63×oil-immersion objective lens and and Image J.

## 1.1 Synthesis and characterization

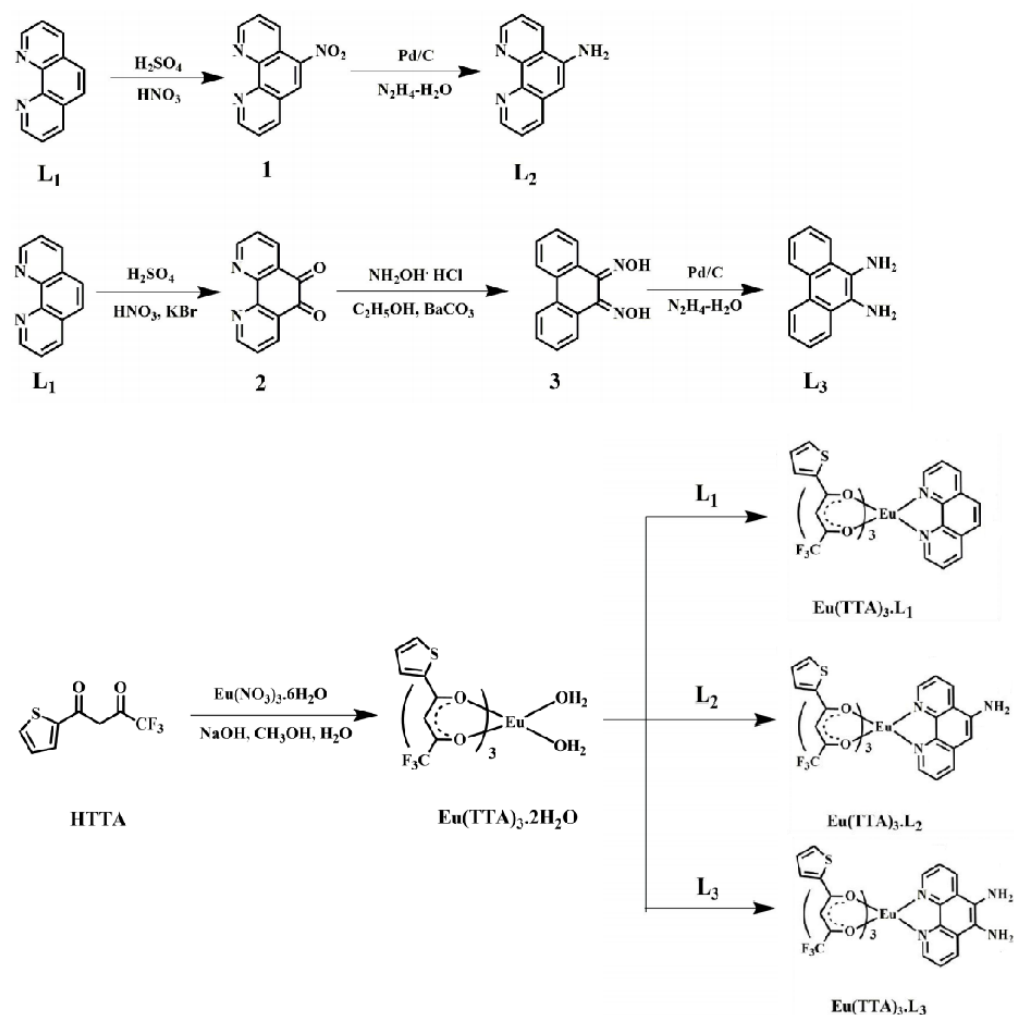

**Figure S1** Synthetic routes of Eu(TTA)<sub>3</sub>-L1-3.

### ► Synthesis of Eu(TTA)<sub>3</sub>·H<sub>2</sub>O

Intermediates L<sub>2</sub>, L<sub>3</sub> were synthesized according to Ref. [1, 2]. Weigh 6.660 g (30 mmol) of HTTA in a 100 mL flask, dissolve it with an appropriate amount of methanol, add to it 1.200 g (30 mmol) of NaOH solution dissolved in distilled water, stirred for 5 min, and added 2 ml of methanol to the flask. 4.460 g (10 mmol) of Eu(NO<sub>3</sub>)<sub>3</sub>·6H<sub>2</sub>O solution dissolved in 2 ml of methanol was added to the flask, and the reaction was stirred at

room temperature for 24 h. 200 mL of distilled water was added to the reaction solution with constant stirring. The reaction solution was stirred for 24 h at room temperature, and 200 mL of distilled water was added to the reaction solution with constant stirring, and a large amount of white solid was generated, filtered, washed and dried under vacuum to obtain a white powder. The solid was 8.64 g, yield: 91%.  $^1\text{H-NMR}$  ( $\text{d}_6\text{-DMSO}$ , 400 MHz, ppm) $\delta$ : 7.74-7.20 (m, 4H), 6.52 (s, 4H), 6.35 (s, 3H), 4.63-4.21 (m, 1H), 3.78 (s, 3H), 1.91 (s, 4H);  $^{13}\text{C-NMR}$  ( $\text{d}_6\text{-DMSO}$ , 100MHz, ppm) $\delta$ : 181.53, 135.46, 130.21, 128.92, 124.65, 97.21, 38.91.

► Synthesis of  $\text{Eu}(\text{TTA})_3\text{-L1-3}$

Weigh 0.2556 g (0.5 mmol) of  $\text{Eu}(\text{TTA})_3\cdot 2\text{H}_2\text{O}$  in a 100 mL flask, dissolve the appropriate amount of  $\text{CHCl}_3$ . The reaction solution was added with 0.5 mol of ligand  $\text{L}_{1-3}$  solution dissolved with appropriate amount of  $\text{CHCl}_3$ , heated to reflux. The reaction solution was heated to reflux and reacted for 12 h. After cooling and standing, a light yellow solid was precipitated, filtered, washed and dried. The complex  $\text{Eu}(\text{TTA})_3\text{-L1-3}$  was obtained.

$\text{Eu}(\text{TTA})_3\text{-L1}$  yield: 85%.  $^1\text{H-NMR}$ ( $\text{d}_6\text{-DMSO}$ , 400 MHz, ppm) $\delta$ : 9.09 (s, 2H), 8.50 (s, 2H), 7.89 (d,  $J = 88.7$  Hz, 3H), 7.42 (s, 4H), 6.57 – 6.24 (m, 6H), 3.75 (s, 3H).  $^{13}\text{C-NMR}$  (100MHz,  $\text{DMSO-d}_6$ ),  $\delta$ (ppm): 170.23, 159.91, 156.71, 143.29, 143.24, 127.75, 127.71, 114.06. ESI-MS:  $m/z$ ,  $[\text{C}_{36}\text{H}_{20}\text{EuF}_9\text{N}_2\text{O}_6\text{S}_3]^+ = \text{cal: } 995.507, \text{ found: } 995.72$ .

$\text{Eu}(\text{TTA})_3\text{-L2}$  yield: 84%.  $^1\text{H-NMR}$ ( $\text{d}_6\text{-DMSO}$ , 400 MHz, ppm) $\delta$ : 8.62 (d,  $J = 8.5$  Hz, 1H), 8.43 (d,  $J = 4.4$  Hz, 2H), 8.13 – 7.97 (m, 5H), 7.72 (dd,  $J = 5.0, 1.1$  Hz, 3H), 7.67 – 7.60 (m, 1H), 7.50 (dd,  $J = 8.4, 4.3$  Hz, 1H), 7.42 (s, 3H), 7.16 (dd,  $J = 5.0, 3.8$  Hz,

3H), 6.84 (s, 1H), 5.74 (d, J = 8.3 Hz, 1H).  $^{13}\text{C}$ -NMR (100MHz, DMSO- $d_6$ ),  $\delta$ (ppm): 171.32, 162.77, 160.24, 134.53, 134.50, 131.42, 131.33, 129.01, 128.98, 128.58, 128.52, 124.57, 124.53, 123.67, 123.56, 116.40, 116.18. ESI-MS:  $m/z$ ,  $[\text{C}_{36}\text{H}_{21}\text{EuF}_9\text{N}_3\text{O}_6\text{S}_3]^+ = \text{cal: } 1010.513$ , found: 1010.745.

$\text{Eu}(\text{TTA})_3\text{-L}_3$  yield: 86%.  $^1\text{H}$ -NMR( $d_6$ -DMSO, 400 MHz, ppm) $\delta$ : 9.05 (d, J = 4.0 Hz, 2H), 8.05 (d, J = 8.2 Hz, 2H), 7.49 (dd, J = 25.2, 4.6 Hz, 6H), 6.50 (s, 5H), 6.14 (s, 3H), 3.73 (s, 4H).  $^{13}\text{C}$ -NMR (100MHz, DMSO- $d_6$ ),  $\delta$ (ppm): 171.35, 141.86, 135.59, 129.99, 129.01, 128.28, 126.33. ESI-MS:  $m/z$ ,  $[\text{C}_{36}\text{H}_{22}\text{EuF}_9\text{N}_4\text{O}_6\text{S}_3]^+ = \text{cal: } 1025.519$ , found: 1025.753.

## 1.2 Crystal Structure

Crystals of  $\text{Eu}(\text{TTA})_3\text{-L}_2$  were obtained using the solvent volatilization method: Equal amounts of  $\text{Eu}(\text{TTA})_3\text{-L}_2$  solid powder were dissolved in 5 mL of acetonitrile and ethanol solvent, respectively, and the two were mixed. Filtered and evaporated at room temperature for 72 h to obtain rod-shaped yellow transparent crystals. The crystallographic data were analyzed using X-ray single crystal diffractometer and the crystallographic data obtained were resolved by OLEX2 software. As shown in the table below, the Eu-N bond length in the crystal structure is about 2.57 Å and the Eu-O bond length is about 2.37 Å.

## 1.3 Two-photon excited fluorescence (TPEF) spectroscopy

Using a fully automated femtosecond titanium gemstone pulsed laser: sapphire system (680-1080 nm, 80 MHz, 140 fs), The two-photon excitation fluorescence (2PEF) method was used to obtain two-photon absorption cross sections (2PA) for  $\text{Eu}(\text{TTA})_3\text{-}$

2H<sub>2</sub>O and Eu(TTA)<sub>3</sub>-L1-3. Two-photon action cross section  $\sigma$  values were determined by the following equation:

$$\sigma = \sigma_{ref} \frac{\Phi_{ref}}{\Phi} \frac{c_{ref}}{c} \frac{n_{ref}}{n} \frac{F}{F_{ref}}$$

The subscript "ref" represents the reference data of rhodamine in DMSO solution ( $c=1.0 \times 10^{-3}$  mol/L, with a 1 cm standard quartz cell). "F" is the intensity of the fluorescence signal detected by the spectrometer. "n", "c" and " $\Phi$ " are the refractive index of the solution, the concentration of the solution and the quantum yield of fluorescence, respectively.

#### 1.4 Three-photon excitation fluorescence (3PEF) measurement method

A control was performed using Rhodamin 6G as a standard sample. The relative fluorescence intensity of the specimens was calculated. All test cuvettes were: 1 cm optical length quartz liquid cell. Spectrometer: Ocean Optics QE65 Pro (300-2500 nm), laser source: Coherent Astrella+TOPAS Prime (1100-1800) nm, 1 kHz, 120 fs. The three-photon absorption cross section was calculated from the following equation:

$$\sigma_S^{(3)} = \frac{c_R \cdot n_S \cdot F_S(\lambda) \cdot Q_R}{c_S \cdot n_R \cdot F_R(\lambda) \cdot Q_S} \cdot \sigma_R^{(3)}$$

where the subscript "R" represents the reference data of rhodamine in DMSO solution ( $c=1.0 \times 10^{-3}$  mol/L), and the subscript S represents the parameters of the assay sample. "C", "n", " $F(\lambda)$ ", and "Q" are the concentration, refractive index, intensity of fluorescence signal, and fluorescence quantum yield, respectively.

#### 1.5 Circular dichroism analysis

Add 0-10  $\mu\text{M}$   $\text{Eu}(\text{TTA})_3\text{-L3}$  ( $c=1.0\times 10^{-5}$  mol/L, in ultrapure water) solution to 1 mL RNA ( $c=10$   $\mu\text{M}/\text{L}$ , in ultrapure water) solution dropwise, mix thoroughly and measure the absorption coefficient of the solution by circular dichroism (BRIGTTIME Chirascan, JASCO810, Jasco-815).

### **1.6 Cell culture**

The HeLa cells were cultured in 25  $\text{cm}^2$  culture flasks in DMEM, supplemented with fetal bovine serum (10 %), penicillin (100 units/mL) and streptomycin (50 units/mL) at 37 °C in a  $\text{CO}_2$  incubator (95 % relative humidity, 5 %  $\text{CO}_2$ ). Cells were seeded in 35 mm glass bottom cell culture dishes, at a density of  $1\times 10^5$  cells.

### **1.7 Cytotoxicity assay**

The toxicity of different concentrations of  $\text{Eu}(\text{TTA})_3\text{-L1-3}$  on human cervical cancer (HeLa) cells was determined by MTT method. (1) HeLa cells were cultured in DMEM with 10% calf serum at 37°C and 5%  $\text{CO}_2$  for 48 hours. (2) HeLa cells were inoculated in 96-well plates at an inoculum concentration of  $1\times 10^4$  cells/100  $\mu\text{L}$  and incubated at 37°C, 5%  $\text{CO}_2$  for 48 hours. (3) The medium was aspirated and 100  $\mu\text{L}$  of calf serum-free DMEM medium was re-added to each well, and different concentrations of  $\text{Eu}(\text{TTA})_3\text{-L1-3}$  (DMSO) were added to the wells, and 7 parallel controls were set up for each concentration gradient. The incubation was continued for 8 hours under the same conditions as above. (4) Add 50  $\mu\text{l}$  MTT (5 mg/mL) to each well and incubate for 4 hours under the same conditions as described above. (5) After aspirating the medium with a 1 mL syringe, 200  $\mu\text{l}$  of LDMSO was added to each well. After shaking the plate using a Tecan Infinite M200 multifunctional enzyme marker, the absorbance at 570 nm

was measured, and the cell viability of cells in the wells was calculated using the wells without the sample added as a control with 100% cell viability.

### **1.8 Photostability analysis**

Under the imaging conditions of STED ( $\lambda_{ex}=405\text{nm}$ ,  $\lambda_{em}=610\text{nm}$ , doughnut laser: is 660nm) at a scanning rate of once per second for 500 seconds of cyclic irradiation.

### **1.9 STED super-resolution image.**

The compound was excited under STED laser (doughnut laser: 660 nm), the emission signals were collected using HyD reflected light detectors (RLDs) with 2048\*2048 pixel and \*100 scanning speed. The STED micrographs were further processed 'deconvolution wizard' function using Huygens Professional software (version: 16.05) under authorized license. The area radiuses were estimated under 0.02 micros with the exclusion of 60 absolute background values. Maximum iterations were 10-time, signal-to- noise ration 30 was applied, with quality threshold 0.02; iteration mode: Optimized; Brick layout:Auto.



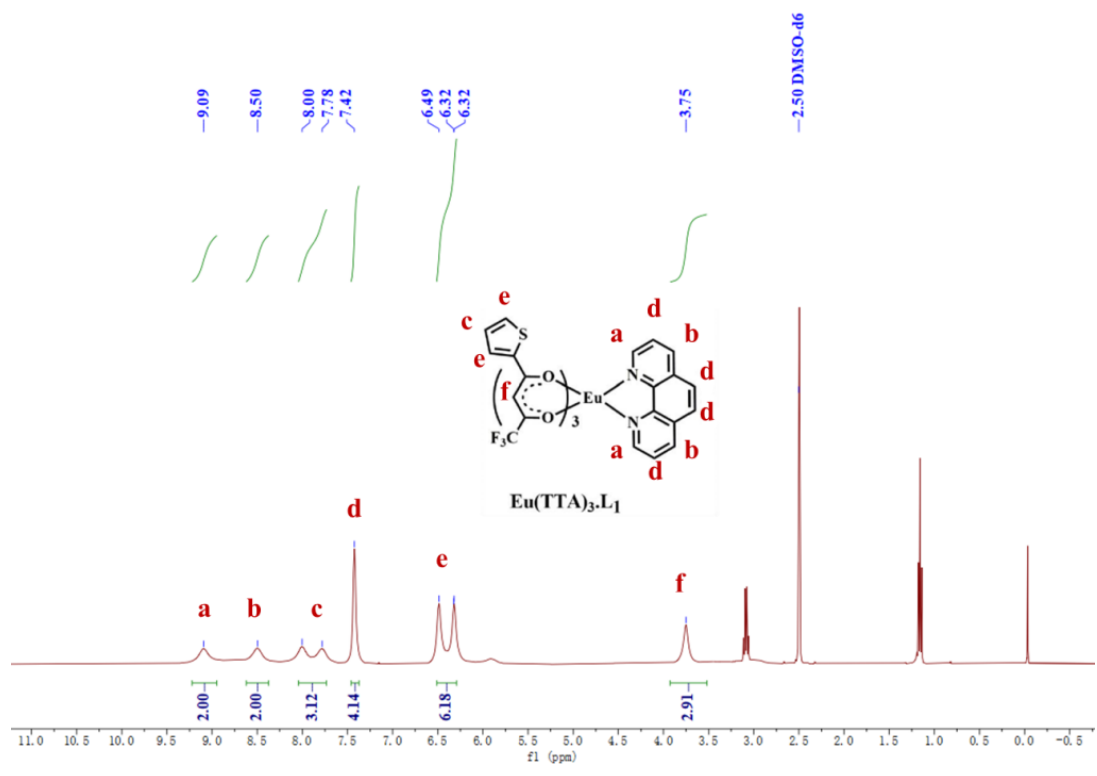

Figure S2  $^1\text{H-NMR}$  spectrum of  $\text{Eu}(\text{TTA})_3 \cdot \text{L}_1$

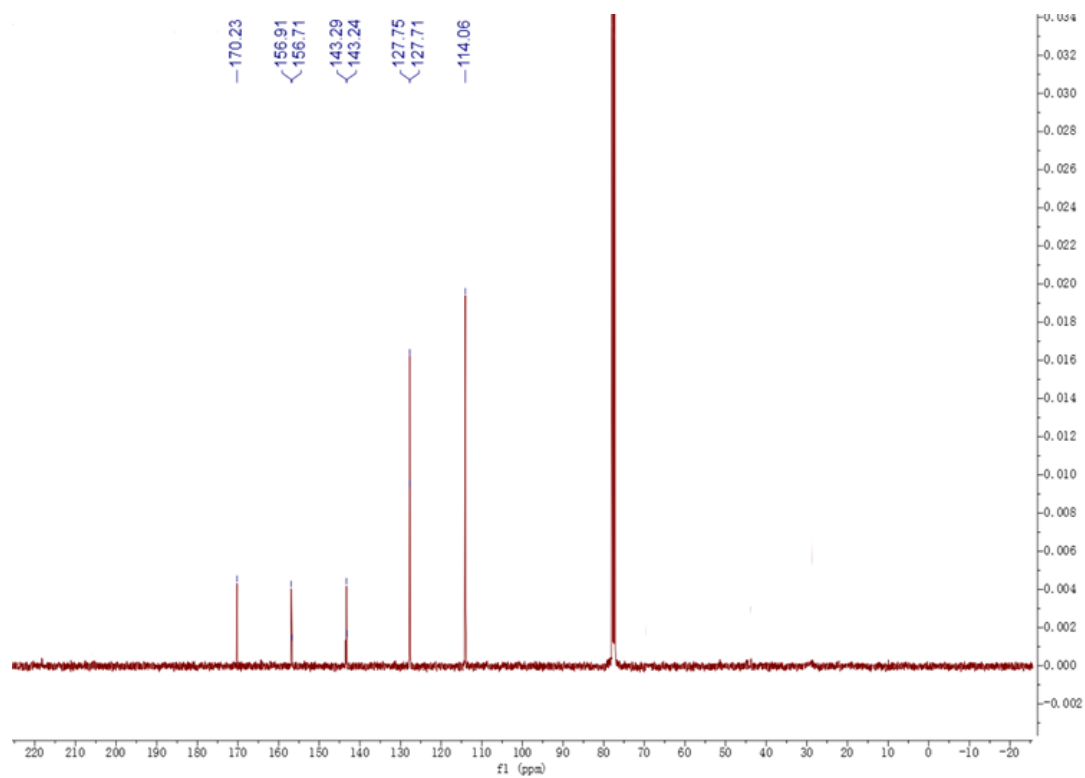

Figure S3  $^{13}\text{C-NMR}$  spectrum of  $\text{Eu}(\text{TTA})_3 \cdot \text{L}_1$

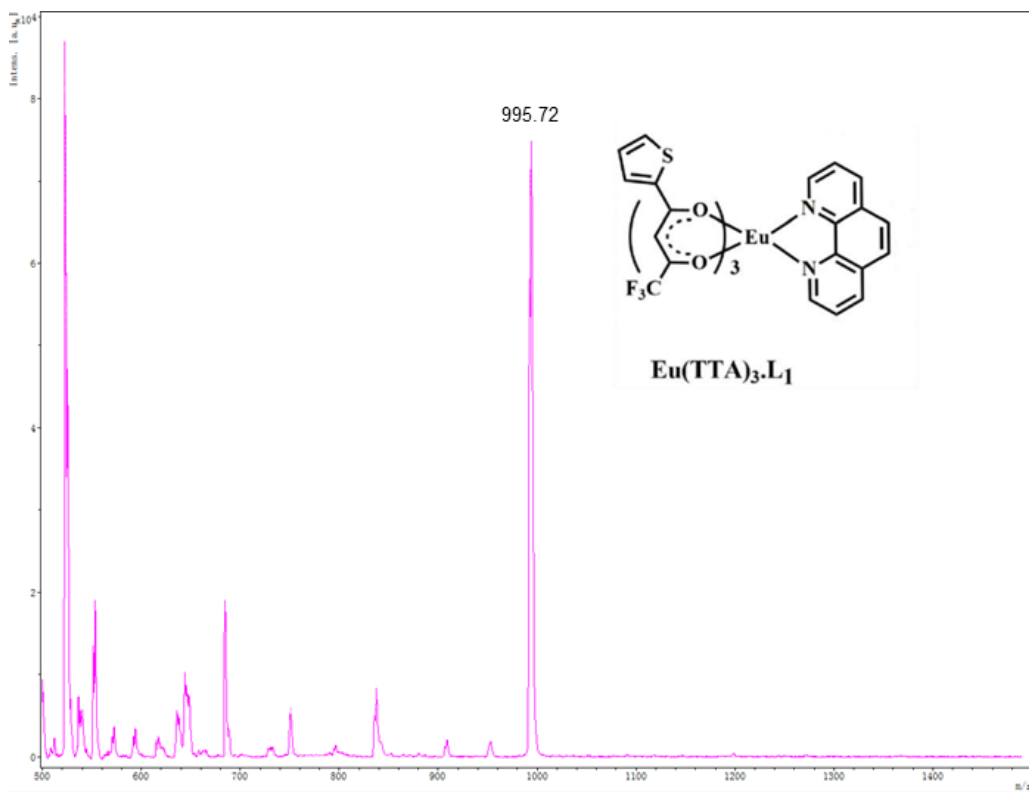

Figure S4 Maldi-tof-MS. of Eu(TTA)<sub>3</sub>·L1

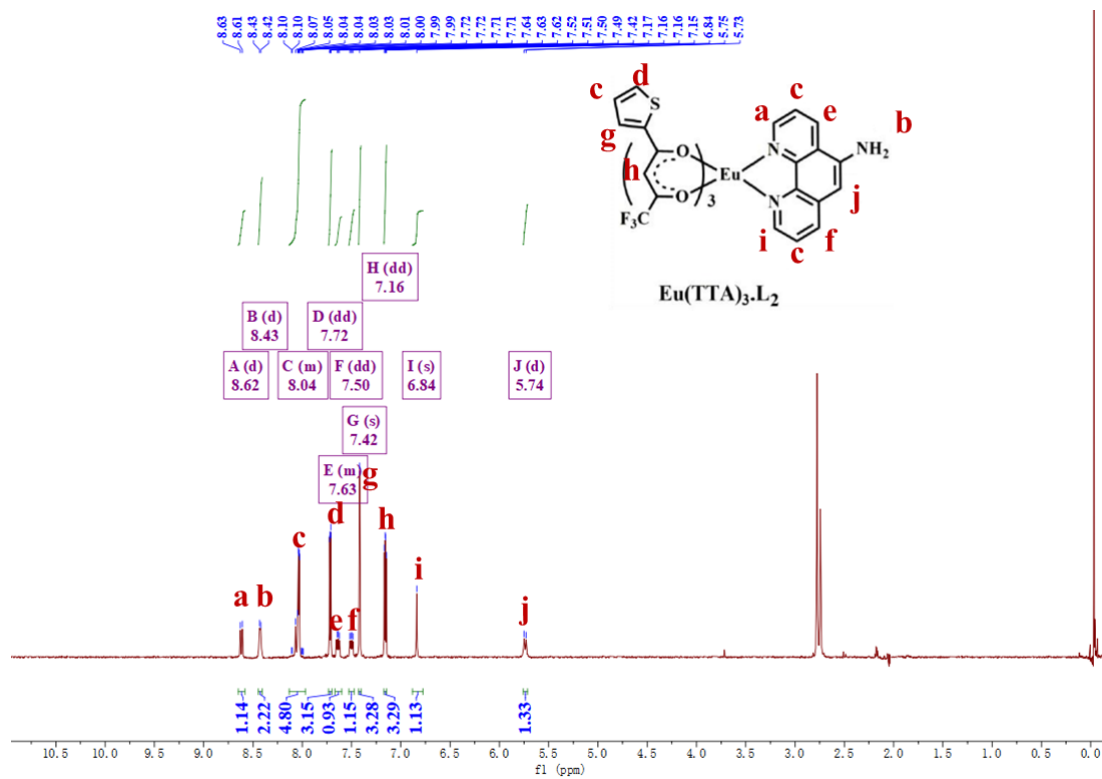

Figure S5 <sup>1</sup>H-NMR spectrum of Eu(TTA)<sub>3</sub>·L2

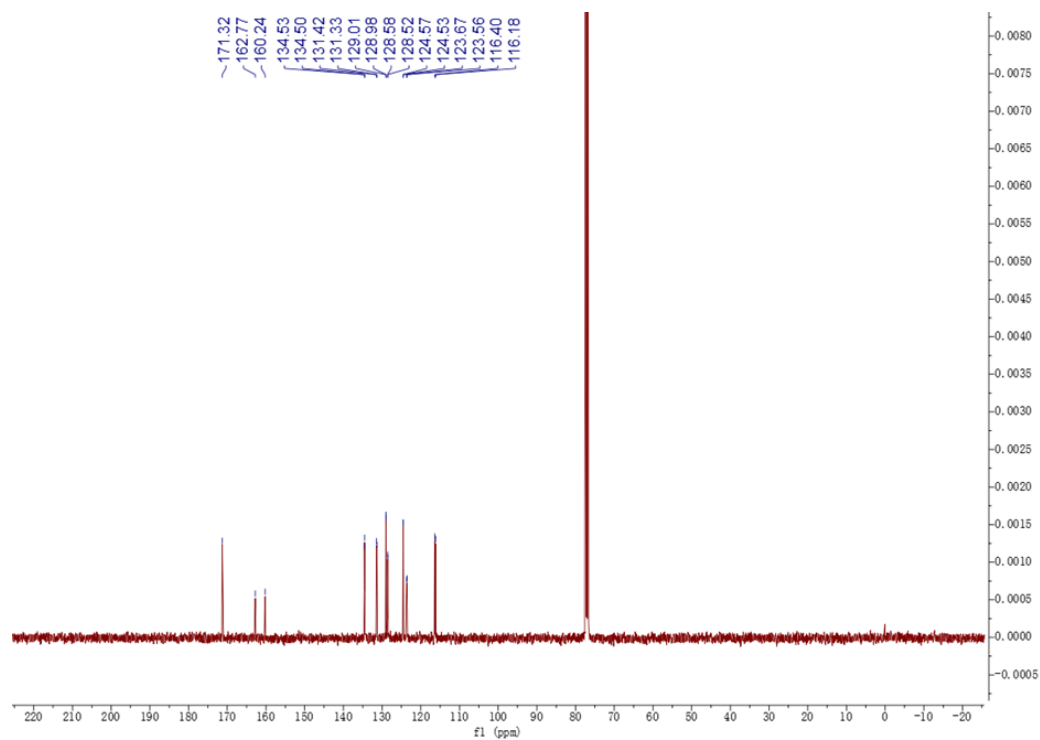

**Figure S6**  $^{13}\text{C}$ -NMR spectrum of  $\text{Eu}(\text{TTA})_3 \cdot \text{L}_2$

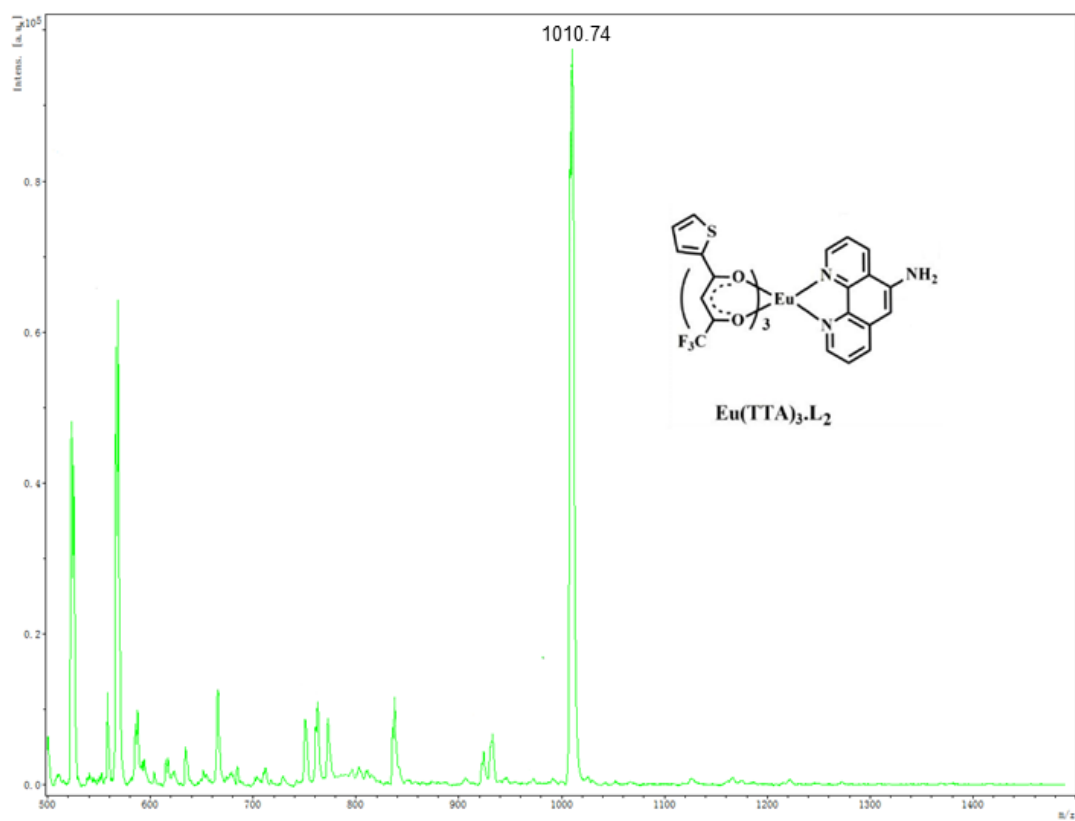

**Figure S7** Maldi-tof-MS. of  $\text{Eu}(\text{TTA})_3 \cdot \text{L}_2$

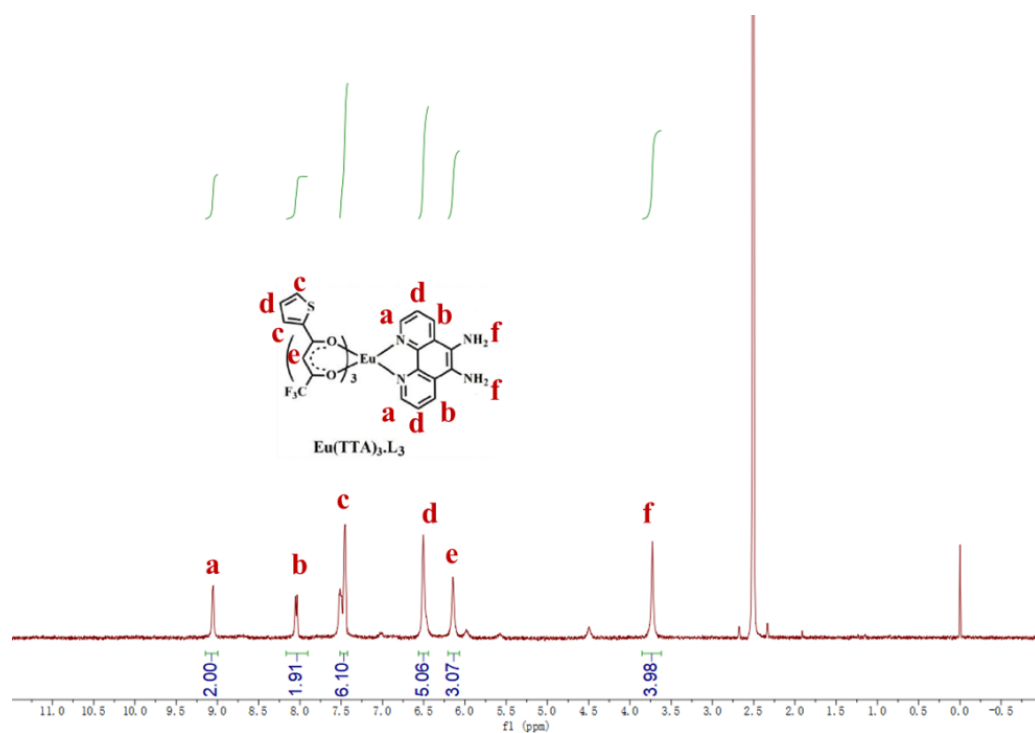

**Figure S8**  $^1\text{H-NMR}$  spectrum of  $\text{Eu}(\text{TTA})_3 \cdot \text{L}_3$

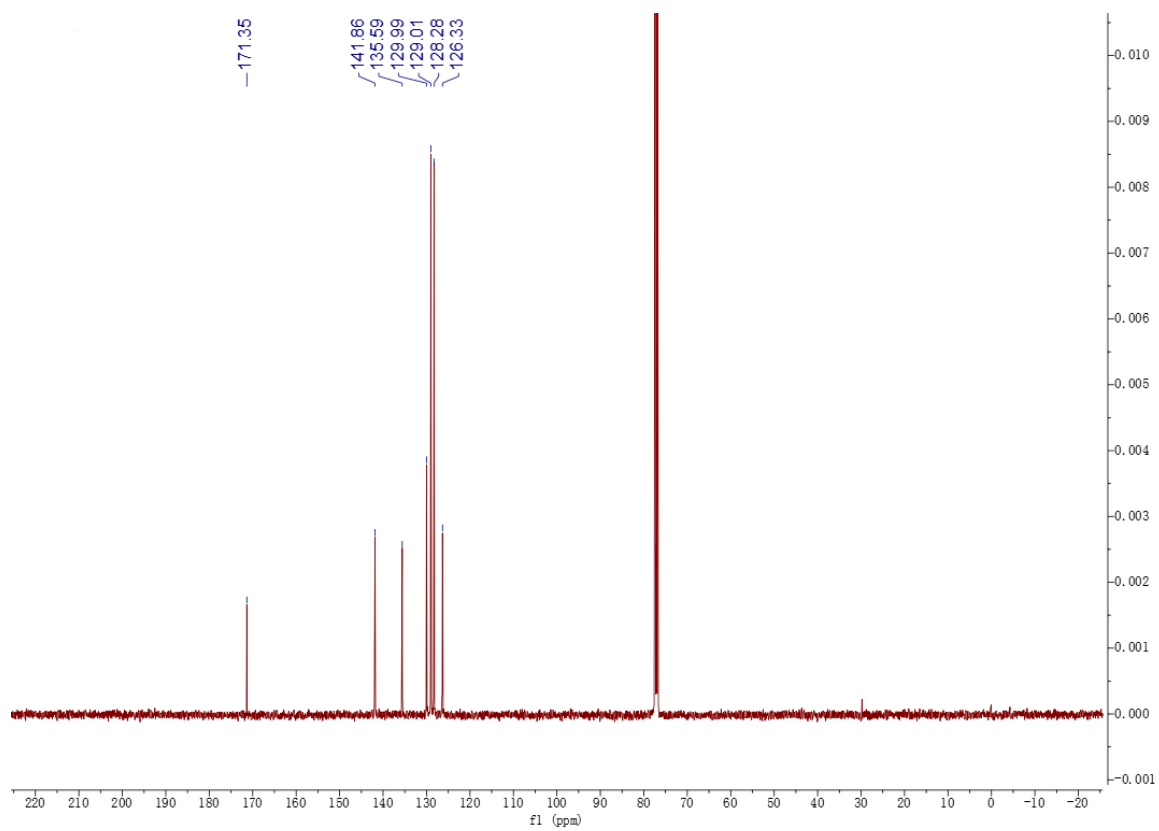

**Figure S9**  $^{13}\text{C-NMR}$  spectrum of  $\text{Eu}(\text{TTA})_3 \cdot \text{L}_3$

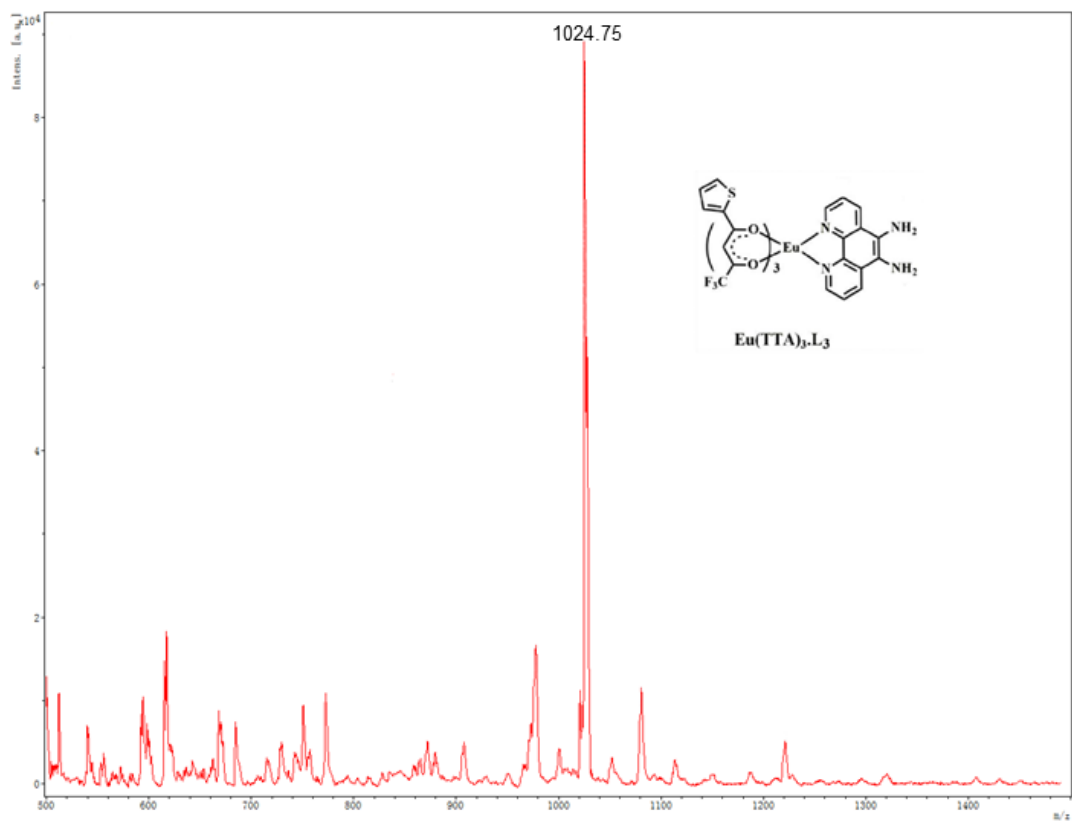

**Figure S10** Maldi-tof-MS. of  $\text{Eu}(\text{TTA})_3 \cdot \text{L}_3$

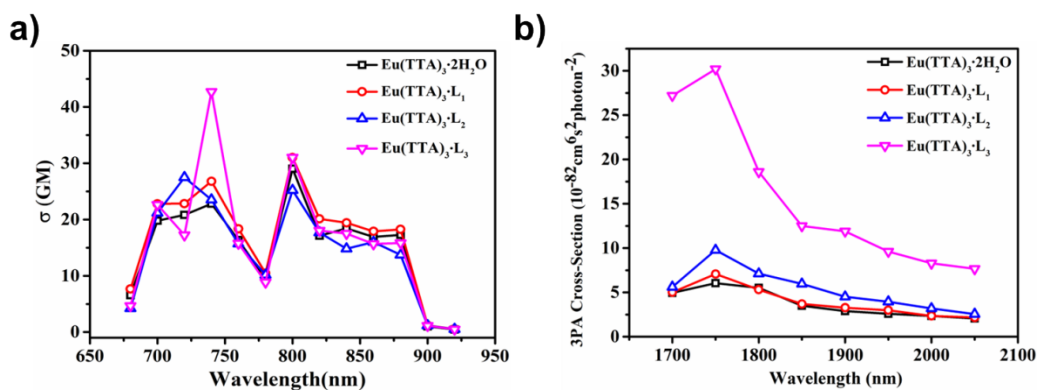

**Figure S11** Two-photon absorption cross-sections (a) and three-photon absorption cross-sections

(b) of  $\text{Eu}(\text{TTA})_3 \cdot \text{L}_1\text{-}3$  in DMSO. ( $c=1.0 \times 10^{-3}$  mol/L)

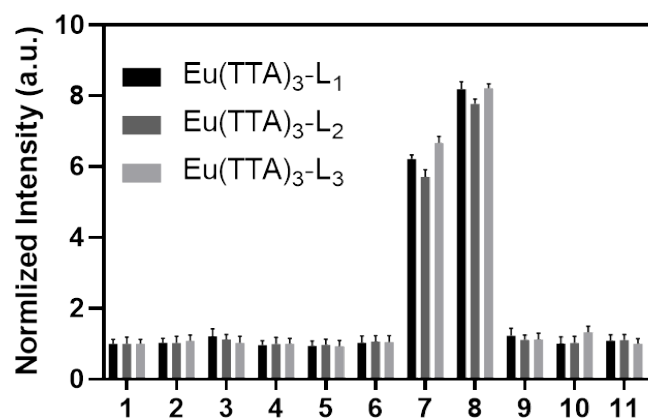

**Figure S12** Fluorescence responses of  $\text{Eu}(\text{TTA})_3\cdot\text{L1-3}$  ( $10\ \mu\text{M}$ ) to (1) blank, (2)  $\text{Ca}^{2+}$ , (3)  $\text{Mg}^{2+}$ , (4) ATP, (5) glutathione, (6)  $\text{HClO}$ , (7) RNA, (8) liposome, (9)  $\text{H}_2\text{O}_2$ , (10) DNA, (11) glycerol

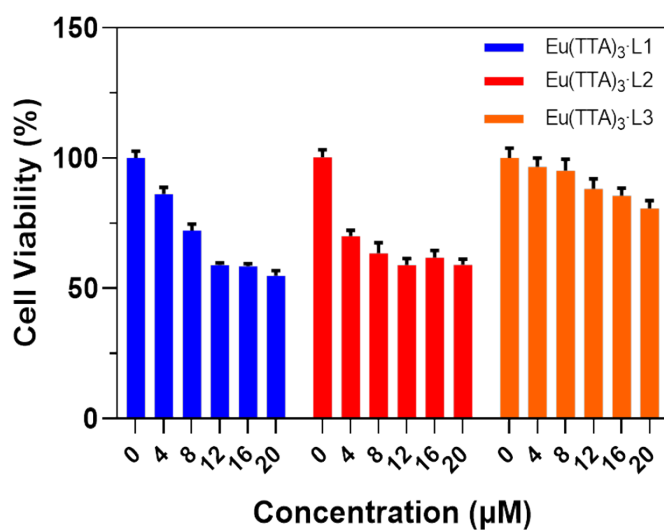

**Figure S13** MTT assay: using  $\text{Eu}(\text{TTA})_3\cdot\text{L1-3}$  (0, 4, 8, 12, 16, and  $20\ \mu\text{M}$ ) against HeLa cells for incubation 8h

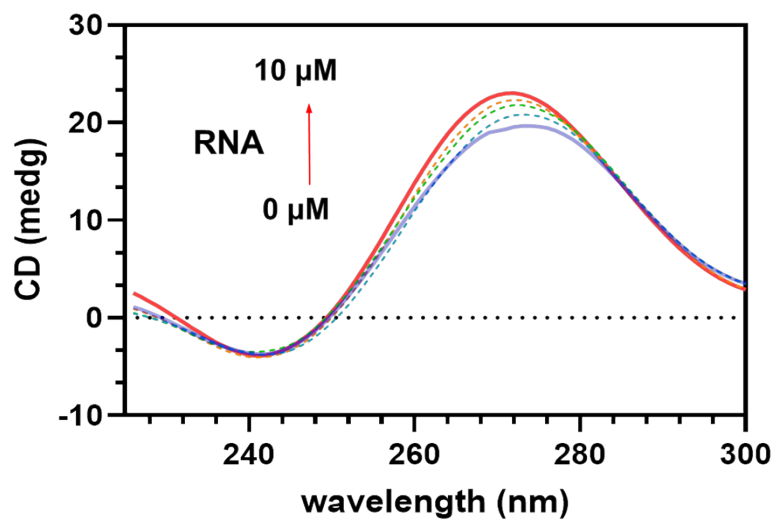

**Figure S14** CD profiles of  $\text{Eu}(\text{TTA})_3\text{-L3}$  in  $\text{RNA}(c=1.0 \times 10^{-5} \text{ mol/L})$  at concentrations of 0 ~ 10  $\mu\text{M}$ .

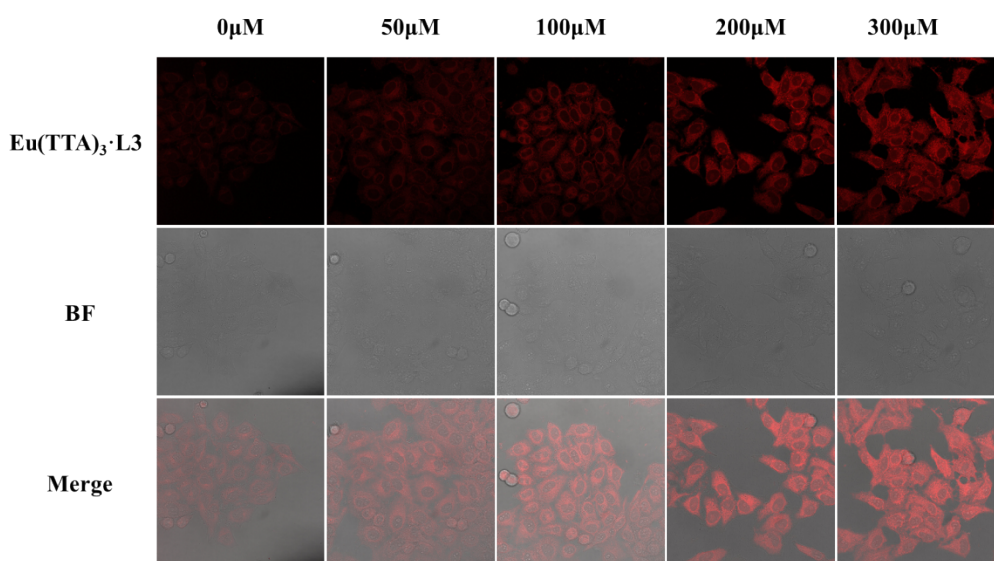

**Figure S15** Response of  $\text{Eu}_3(10 \mu\text{M})$  to different concentrations of exogenous RNA in HeLa-fixed cells.

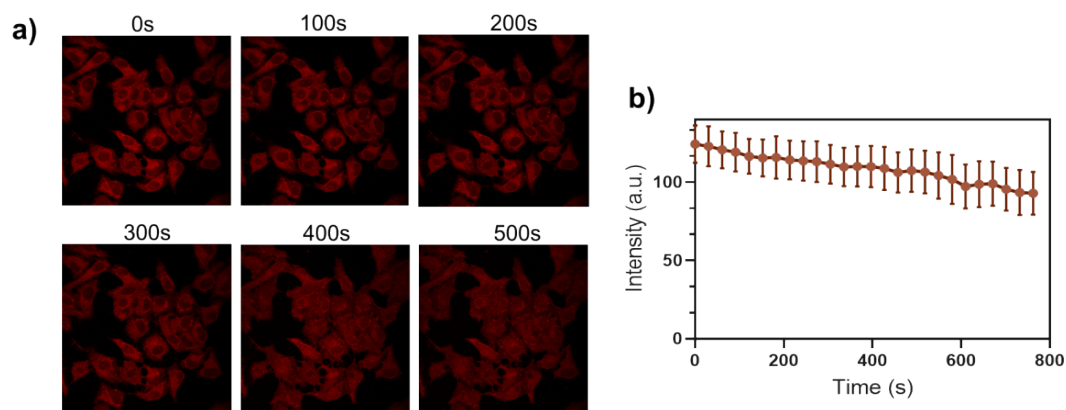

**Figure S16** Photostability experiments. (a)  $\text{Eu}^{3+}$  ( $10 \mu\text{M}$ ) were monitored for cellular photostability by STED. (b) Quantification of fluorescence intensity in (a).

**Table S1** Crystal data of  $\text{Eu}(\text{TTA})_3 \cdot \text{L}_2$

| Complexes                                     | $\text{Eu}(\text{TTA})_3 \cdot \text{L}_2$                               |
|-----------------------------------------------|--------------------------------------------------------------------------|
| Identification code                           | a                                                                        |
| Empirical formula                             | $\text{C}_{72}\text{Eu}_2\text{F}_{18}\text{N}_6\text{O}_{12}\text{S}_6$ |
| Formula weight                                | 1979.06                                                                  |
| Temperature/K                                 | 296.15                                                                   |
| Crystal system                                | triclinic                                                                |
| Space group                                   | P1                                                                       |
| $a/\text{\AA}$                                | 9.6768(14)                                                               |
| $b/\text{\AA}$                                | 13.379(2)                                                                |
| $c/\text{\AA}$                                | 15.458(2)                                                                |
| $\alpha/^\circ$                               | 92.611(2)                                                                |
| $\beta/^\circ$                                | 93.941(2)                                                                |
| $\gamma/^\circ$                               | 103.219(2)                                                               |
| Volume/ $\text{\AA}^3$                        | 1939.9(5)                                                                |
| Z                                             | 1                                                                        |
| $\rho_{\text{calc}}/\text{g/cm}^3$            | 1.694                                                                    |
| $\mu/\text{mm}^{-1}$                          | 1.869                                                                    |
| F(000)                                        | 954.0                                                                    |
| Crystal size/ $\text{mm}^3$                   | $? \times ? \times ?$                                                    |
| Radiation                                     | $\text{MoK}\alpha$ ( $\lambda = 0.71073$ )                               |
| $2\theta$ range for data collection/ $^\circ$ | 2.646 to 54.764                                                          |
| Index ranges                                  | $-12 \leq h \leq 12, -17 \leq k \leq 16, -19 \leq l \leq 19$             |
| Reflections collected                         | 15205                                                                    |
| Independent reflections                       | 11876 [ $R_{\text{int}} = 0.0361, R_{\text{sigma}} = 0.1012$ ]           |
| Data/restraints/parameters                    | 11876/3105/1045                                                          |



|                                                |                                  |
|------------------------------------------------|----------------------------------|
| Goodness-of-fit on $F^2$                       | 1.031                            |
| Final R indexes [ $I \geq 2\sigma(I)$ ]        | $R_1 = 0.0783$ , $wR_2 = 0.1905$ |
| Final R indexes [all data]                     | $R_1 = 0.1263$ , $wR_2 = 0.2338$ |
| Largest diff. peak/hole / $e \text{ \AA}^{-3}$ | 1.74/-0.94                       |
| Flack parameter                                | 0.11(3)                          |

**Table S2 Bond length of  $\text{Eu}(\text{TTA})_3\text{-L}_2$**

| Atom | Atom | Length/ $\text{\AA}$ | Atom | Atom | Length/ $\text{\AA}$ |
|------|------|----------------------|------|------|----------------------|
| Eu1  | O9   | 2.39(3)              | Eu2  | O1   | 2.36(3)              |
| Eu1  | O10  | 2.37(2)              | Eu2  | O1AA | 2.31(3)              |
| Eu1  | O13  | 2.36(2)              | Eu2  | O8   | 2.36(3)              |
| Eu1  | O14  | 2.34(2)              | Eu2  | O15  | 2.39(2)              |
| Eu1  | O16  | 2.35(2)              | Eu2  | O46  | 2.31(3)              |
| Eu1  | O17  | 2.41(2)              | Eu2  | N19  | 2.62(3)              |
| Eu1  | N24  | 2.57(3)              | Eu2  | N35  | 2.57(3)              |
| Eu1  | N31  | 2.60(3)              | S1AA | C6AA | 1.511(17)            |
| S6   | C8   | 1.63(3)              | S1AA | C9AA | 1.457(17)            |
| S6   | C41  | 1.71(4)              | S2   | C1BA | 1.67(4)              |
| S11  | C10  | 1.82(3)              | S2   | C5AA | 1.68(4)              |
| S11  | C21  | 1.80(3)              | S4   | C3   | 1.77(4)              |
| F32  | C136 | 1.38(4)              | S4   | C44  | 1.73(5)              |
| F37  | C136 | 1.25(4)              | F40  | C89  | 1.45(4)              |
| F48  | C96  | 1.34(4)              | F43  | C89  | 1.28(4)              |
| F52  | C75  | 1.38(4)              | F49  | C127 | 1.41(4)              |
| F54  | C136 | 1.27(4)              | F51  | C94  | 1.23(4)              |
| F56  | C96  | 1.41(4)              | F58  | C89  | 1.48(4)              |
| F64  | C75  | 1.70(4)              | F76  | F95  | 1.71(3)              |
| F69  | C75  | 1.39(4)              | F76  | C127 | 1.31(4)              |
| F73  | C96  | 1.42(4)              | F84  | C94  | 1.26(4)              |
| O9   | C39  | 1.24(4)              | F95  | C127 | 1.02(4)              |
| O10  | C66  | 1.25(4)              | F107 | C94  | 1.34(4)              |
| O13  | C28  | 1.26(4)              | O0AA | C7AA | 1.23(4)              |
| O14  | C80  | 1.35(4)              | O1   | C8AA | 1.22(4)              |
| O16  | C57  | 1.26(4)              | O1AA | C30  | 1.39(5)              |
| O17  | C50  | 1.26(4)              | O8   | C25  | 1.28(5)              |
| N14  | C88  | 1.36(4)              | O15  | C79  | 1.19(4)              |
| N24  | C55  | 1.31(4)              | O46  | C4AA | 1.32(4)              |

---

|      |      |         |      |      |           |
|------|------|---------|------|------|-----------|
| N24  | C71  | 1.37(4) | N9   | C5BA | 1.51(4)   |
| N31  | C16  | 1.28(4) | N19  | C53  | 1.43(4)   |
| N31  | C34  | 1.28(4) | N19  | C60  | 1.29(4)   |
| C1A  | C6   | 1.35(4) | N35  | C4BA | 1.37(4)   |
| C1A  | C86  | 1.37(4) | N35  | C36  | 1.49(5)   |
| C1AA | C15  | 1.95(4) | C0AA | C6AA | 2.01(2)   |
| C1AA | C21  | 1.74(4) | C0AA | C9AA | 1.42(2)   |
| C4   | C70  | 1.58(5) | C0AA | C18  | 1.455(18) |
| C4   | C81  | 1.51(5) | C1   | C7AA | 1.40(5)   |
| C6   | C16  | 1.43(4) | C1   | C8AA | 1.40(6)   |
| C6BA | C81  | 1.26(4) | C1BA | C7AA | 1.46(5)   |
| C6BA | S0AA | 1.41(4) | C1BA | C0BA | 1.52(5)   |
| C8   | C111 | 1.62(5) | C2   | C5AA | 1.32(5)   |
| C10  | C15  | 1.15(4) | C2   | C0BA | 1.91(4)   |
| C21  | C66  | 1.36(5) | C2AA | C3   | 1.14(5)   |
| C26  | C39  | 1.45(5) | C2AA | C3AA | 1.34(4)   |
| C26  | C80  | 1.30(5) | C2BA | C3BA | 1.42(4)   |
| C28  | C41  | 1.46(5) | C2BA | C77  | 1.43(4)   |
| C28  | C62  | 1.53(5) | C3   | C3AA | 2.03(5)   |
| C34  | C55  | 1.53(5) | C3AA | C44  | 1.31(5)   |
| C34  | C86  | 1.38(5) | C3BA | C4BA | 1.29(4)   |
| C39  | C70  | 1.48(5) | C4AA | C68  | 1.28(5)   |
| C41  | C98  | 1.44(5) | C4AA | C94  | 1.63(6)   |
| C50  | C62  | 1.45(5) | C5BA | C74  | 1.06(4)   |
| C50  | C96  | 1.45(5) | C5BA | C77  | 1.71(5)   |
| C55  | C93  | 1.35(5) | C6AA | C18  | 1.453(18) |
| C57  | C90  | 1.25(5) | C6AA | C25  | 1.73(5)   |
| C57  | C136 | 1.68(5) | C8AA | C127 | 1.63(5)   |
| C66  | C90  | 1.47(5) | C25  | C85  | 1.38(6)   |
| C70  | S0AA | 1.67(4) | C30  | C44  | 1.46(5)   |
| C71  | C122 | 1.34(5) | C30  | C68  | 1.24(5)   |
| C75  | C80  | 1.42(5) | C36  | C53  | 1.36(5)   |
| C81  | S0AA | 2.19(3) | C36  | C77  | 1.38(5)   |
| C86  | C88  | 1.33(4) | C53  | C87  | 1.48(5)   |
| C88  | C126 | 1.64(4) | C60  | C128 | 1.46(5)   |
| C93  | C125 | 1.50(4) | C74  | C87  | 1.33(4)   |
| C93  | C126 | 1.44(4) | C78  | C87  | 1.37(4)   |
| C98  | C111 | 1.48(4) | C78  | C128 | 1.32(4)   |
| C122 | C125 | 1.46(4) | C79  | C85  | 1.52(5)   |
| Eu2  | O0AA | 2.39(3) | C79  | C89  | 1.42(5)   |

---

**Table S3 Bond angle of Eu(TTA)<sub>3</sub>-L<sub>2</sub>**

| Atom | Atom | Atom | Angle/°  | Atom | Atom | Atom | Angle/°   |
|------|------|------|----------|------|------|------|-----------|
| O9   | Eu1  | O17  | 117.5(8) | O1AA | Eu2  | O0AA | 73.1(9)   |
| O9   | Eu1  | N24  | 76.7(9)  | O1AA | Eu2  | O1   | 115.8(10) |
| O9   | Eu1  | N31  | 76.0(8)  | O1AA | Eu2  | O8   | 76.5(9)   |
| O10  | Eu1  | O9   | 136.7(8) | O1AA | Eu2  | O15  | 144.5(9)  |
| O10  | Eu1  | O17  | 79.7(8)  | O1AA | Eu2  | O46  | 72.3(9)   |
| O10  | Eu1  | N24  | 109.9(9) | O1AA | Eu2  | N19  | 139.2(9)  |
| O10  | Eu1  | N31  | 70.7(9)  | O1AA | Eu2  | N35  | 80.4(10)  |
| O13  | Eu1  | O9   | 72.6(9)  | O8   | Eu2  | O0AA | 136.2(9)  |
| O13  | Eu1  | O10  | 76.3(9)  | O8   | Eu2  | O1   | 151.3(9)  |
| O13  | Eu1  | O17  | 72.5(8)  | O8   | Eu2  | O15  | 74.1(9)   |
| O13  | Eu1  | N24  | 138.0(9) | O8   | Eu2  | N19  | 107.4(10) |
| O13  | Eu1  | N31  | 82.6(9)  | O8   | Eu2  | N35  | 69.7(10)  |
| O14  | Eu1  | O9   | 72.3(9)  | O15  | Eu2  | N19  | 69.9(9)   |
| O14  | Eu1  | O10  | 150.1(8) | O15  | Eu2  | N35  | 107.1(9)  |
| O14  | Eu1  | O13  | 115.4(9) | O46  | Eu2  | O0AA | 119.5(9)  |
| O14  | Eu1  | O16  | 86.8(8)  | O46  | Eu2  | O1   | 80.6(9)   |
| O14  | Eu1  | O17  | 78.3(9)  | O46  | Eu2  | O8   | 78.9(9)   |
| O14  | Eu1  | N24  | 80.5(9)  | O46  | Eu2  | O15  | 82.8(9)   |
| O14  | Eu1  | N31  | 135.7(9) | O46  | Eu2  | N19  | 148.4(9)  |
| O16  | Eu1  | O9   | 146.9(8) | O46  | Eu2  | N35  | 142.4(9)  |
| O16  | Eu1  | O10  | 70.1(8)  | N35  | Eu2  | N19  | 64.3(10)  |
| O16  | Eu1  | O13  | 140.5(8) | C9AA | S1AA | C6AA | 87.4(17)  |
| O16  | Eu1  | O17  | 81.4(8)  | C1BA | S2   | C5AA | 99.0(18)  |
| O16  | Eu1  | N24  | 74.7(9)  | C44  | S4   | C3   | 88.5(19)  |
| O16  | Eu1  | N31  | 104.6(8) | C127 | F76  | F95  | 36.7(17)  |
| O17  | Eu1  | N24  | 148.8(8) | C127 | F95  | F76  | 50(3)     |
| O17  | Eu1  | N31  | 145.0(8) | C7AA | O0AA | Eu2  | 139(3)    |
| N24  | Eu1  | N31  | 62.5(9)  | C8AA | O1   | Eu2  | 132(3)    |
| C8   | S6   | C41  | 97.5(19) | C30  | O1AA | Eu2  | 133(2)    |
| C21  | S11  | C10  | 91.6(14) | C25  | O8   | Eu2  | 138(3)    |
| C39  | O9   | Eu1  | 136(2)   | C79  | O15  | Eu2  | 131(2)    |
| C66  | O10  | Eu1  | 139(2)   | C4AA | O46  | Eu2  | 133(2)    |
| C28  | O13  | Eu1  | 138(2)   | C53  | N19  | Eu2  | 118(2)    |
| C80  | O14  | Eu1  | 135(2)   | C60  | N19  | Eu2  | 125(3)    |
| C57  | O16  | Eu1  | 135(2)   | C60  | N19  | C53  | 118(3)    |
| C50  | O17  | Eu1  | 129(2)   | C4BA | N35  | Eu2  | 120(2)    |
| C55  | N24  | Eu1  | 123(2)   | C4BA | N35  | C36  | 120(3)    |

---

|      |      |      |           |      |      |      |           |
|------|------|------|-----------|------|------|------|-----------|
| C55  | N24  | C71  | 116(3)    | C36  | N35  | Eu2  | 120(2)    |
| C71  | N24  | Eu1  | 119(2)    | C9AA | C0AA | C6AA | 71.0(16)  |
| C16  | N31  | Eu1  | 124(2)    | C9AA | C0AA | C18  | 117(2)    |
| C16  | N31  | C34  | 115(3)    | C18  | C0AA | C6AA | 46.1(9)   |
| C34  | N31  | Eu1  | 121(2)    | C8AA | C1   | C7AA | 120(4)    |
| C6   | C1A  | C86  | 117(3)    | C7AA | C1BA | S2   | 114(3)    |
| C21  | C1AA | C15  | 88.0(19)  | C7AA | C1BA | C0BA | 124(3)    |
| C81  | C4   | C70  | 93(3)     | C0BA | C1BA | S2   | 120(3)    |
| C1A  | C6   | C16  | 117(3)    | C5AA | C2   | C0BA | 116(3)    |
| C81  | C6BA | S0AA | 110(3)    | C3   | C2AA | C3AA | 109(4)    |
| C111 | C8   | S6   | 103(2)    | C3BA | C2BA | C77  | 118(3)    |
| C15  | C10  | S11  | 120(3)    | S4   | C3   | C3AA | 76.5(16)  |
| C10  | C15  | C1AA | 116(3)    | C2AA | C3   | S4   | 110(3)    |
| N31  | C16  | C6   | 125(3)    | C2AA | C3   | C3AA | 39(2)     |
| C1AA | C21  | S11  | 114.6(18) | C2AA | C3AA | C3   | 32(2)     |
| C66  | C21  | S11  | 116(3)    | C44  | C3AA | C2AA | 121(4)    |
| C66  | C21  | C1AA | 127(3)    | C44  | C3AA | C3   | 91(3)     |
| C80  | C26  | C39  | 124(4)    | C4BA | C3BA | C2BA | 119(3)    |
| O13  | C28  | C41  | 119(3)    | O46  | C4AA | C94  | 114(3)    |
| O13  | C28  | C62  | 126(3)    | C68  | C4AA | O46  | 123(4)    |
| C41  | C28  | C62  | 115(3)    | C68  | C4AA | C94  | 124(4)    |
| N31  | C34  | C55  | 118(3)    | C3BA | C4BA | N35  | 125(3)    |
| N31  | C34  | C86  | 125(3)    | C2   | C5AA | S2   | 110(2)    |
| C86  | C34  | C55  | 116(3)    | N9   | C5BA | C77  | 114(2)    |
| O9   | C39  | C26  | 125(4)    | C74  | C5BA | N9   | 115(3)    |
| O9   | C39  | C70  | 112(3)    | C74  | C5BA | C77  | 130(3)    |
| C26  | C39  | C70  | 123(4)    | S1AA | C6AA | C0AA | 85.5(14)  |
| C28  | C41  | S6   | 117(3)    | S1AA | C6AA | C25  | 115(2)    |
| C98  | C41  | S6   | 117(3)    | C18  | C6AA | S1AA | 131.7(18) |
| C98  | C41  | C28  | 125(4)    | C18  | C6AA | C0AA | 46.2(9)   |
| O17  | C50  | C62  | 133(4)    | C18  | C6AA | C25  | 113(2)    |
| O17  | C50  | C96  | 111(3)    | C25  | C6AA | C0AA | 159(2)    |
| C96  | C50  | C62  | 115(3)    | O0AA | C7AA | C1   | 124(4)    |
| N24  | C55  | C34  | 114(3)    | O0AA | C7AA | C1BA | 120(3)    |
| N24  | C55  | C93  | 126(3)    | C1   | C7AA | C1BA | 116(4)    |
| C93  | C55  | C34  | 120(3)    | O1   | C8AA | C1   | 132(4)    |
| O16  | C57  | C136 | 108(3)    | O1   | C8AA | C127 | 111(3)    |
| C90  | C57  | O16  | 131(4)    | C1   | C8AA | C127 | 115(3)    |
| C90  | C57  | C136 | 121(3)    | C0AA | C9AA | S1AA | 115(2)    |
| C50  | C62  | C28  | 115(3)    | C6AA | C18  | C0AA | 87.7(15)  |

---

---

|      |      |      |          |      |     |      |        |
|------|------|------|----------|------|-----|------|--------|
| O10  | C66  | C21  | 119(4)   | O8   | C25 | C6AA | 114(3) |
| O10  | C66  | C90  | 122(4)   | O8   | C25 | C85  | 125(4) |
| C21  | C66  | C90  | 119(4)   | C85  | C25 | C6AA | 121(4) |
| C4   | C70  | S0AA | 108(3)   | O1AA | C30 | C44  | 110(3) |
| C39  | C70  | C4   | 126(3)   | C68  | C30 | O1AA | 121(3) |
| C39  | C70  | S0AA | 126(3)   | C68  | C30 | C44  | 129(4) |
| C122 | C71  | N24  | 128(3)   | C53  | C36 | N35  | 116(3) |
| F52  | C75  | F64  | 87(2)    | C53  | C36 | C77  | 131(4) |
| F52  | C75  | F69  | 121(3)   | C77  | C36 | N35  | 113(3) |
| F52  | C75  | C80  | 113(3)   | C3AA | C44 | S4   | 101(3) |
| F69  | C75  | F64  | 114(3)   | C3AA | C44 | C30  | 135(4) |
| F69  | C75  | C80  | 117(3)   | C30  | C44 | S4   | 122(3) |
| C80  | C75  | F64  | 99(3)    | N19  | C53 | C87  | 123(3) |
| O14  | C80  | C75  | 111(3)   | C36  | C53 | N19  | 122(4) |
| C26  | C80  | O14  | 126(3)   | C36  | C53 | C87  | 115(3) |
| C26  | C80  | C75  | 121(4)   | N19  | C60 | C128 | 120(3) |
| C4   | C81  | S0AA | 89(2)    | C30  | C68 | C4AA | 134(4) |
| C6BA | C81  | C4   | 125(3)   | C5BA | C74 | C87  | 122(4) |
| C6BA | C81  | S0AA | 36.9(19) | C2BA | C77 | C5BA | 136(3) |
| C1A  | C86  | C34  | 119(3)   | C36  | C77 | C2BA | 124(3) |
| C88  | C86  | C1A  | 108(3)   | C36  | C77 | C5BA | 100(3) |
| C88  | C86  | C34  | 132(3)   | C128 | C78 | C87  | 122(3) |
| N14  | C88  | C126 | 123(2)   | O15  | C79 | C85  | 133(4) |
| C86  | C88  | N14  | 127(3)   | O15  | C79 | C89  | 116(3) |
| C86  | C88  | C126 | 109(2)   | C89  | C79 | C85  | 110(3) |
| C57  | C90  | C66  | 122(4)   | C25  | C85 | C79  | 119(4) |
| C55  | C93  | C125 | 117(3)   | C74  | C87 | C53  | 120(3) |
| C55  | C93  | C126 | 122(3)   | C74  | C87 | C78  | 126(3) |
| C126 | C93  | C125 | 121(3)   | C78  | C87 | C53  | 114(3) |
| F48  | C96  | F56  | 107(3)   | F40  | C89 | F58  | 90(2)  |
| F48  | C96  | F73  | 98(3)    | F43  | C89 | F40  | 108(3) |
| F48  | C96  | C50  | 118(4)   | F43  | C89 | F58  | 112(3) |
| F56  | C96  | F73  | 115(3)   | F43  | C89 | C79  | 114(3) |
| F56  | C96  | C50  | 109(3)   | C79  | C89 | F40  | 111(3) |
| F73  | C96  | C50  | 111(3)   | C79  | C89 | F58  | 119(3) |
| C41  | C98  | C111 | 102(3)   | F51  | C94 | F84  | 125(4) |
| C98  | C111 | C8   | 116(2)   | F51  | C94 | F107 | 103(3) |
| C71  | C122 | C125 | 115(3)   | F51  | C94 | C4AA | 108(4) |
| C122 | C125 | C93  | 117(3)   | F84  | C94 | F107 | 97(3)  |
| C93  | C126 | C88  | 120(3)   | F84  | C94 | C4AA | 112(3) |

---

---

|      |      |      |           |      |      |      |          |
|------|------|------|-----------|------|------|------|----------|
| F32  | C136 | C57  | 109(3)    | F107 | C94  | C4AA | 109(3)   |
| F37  | C136 | F32  | 105(3)    | F49  | C127 | C8AA | 106(3)   |
| F37  | C136 | F54  | 130(3)    | F76  | C127 | F49  | 91(3)    |
| F37  | C136 | C57  | 107(3)    | F76  | C127 | C8AA | 105(3)   |
| F54  | C136 | F32  | 97(3)     | F95  | C127 | F49  | 128(3)   |
| F54  | C136 | C57  | 106(3)    | F95  | C127 | F76  | 93(3)    |
| O0AA | Eu2  | O15  | 142.3(8)  | F95  | C127 | C8AA | 123(4)   |
| O0AA | Eu2  | N19  | 78.0(9)   | C78  | C128 | C60  | 122(3)   |
| O0AA | Eu2  | N35  | 74.6(9)   | C6BA | S0AA | C70  | 102(2)   |
| O1   | Eu2  | O0AA | 72.0(9)   | C6BA | S0AA | C81  | 32.6(16) |
| O1   | Eu2  | O15  | 83.6(9)   | C70  | S0AA | C81  | 69.5(16) |
| O1   | Eu2  | N19  | 80.7(10)  | C1BA | C0BA | C2   | 89(2)    |
| O1   | Eu2  | N35  | 135.6(10) |      |      |      |          |

---
